# Supplementary material
Source: publisher figshare collection journal article supplement (https://tandf.figshare.com/ndownloader/files/22295337)
Supplement: Supplementary file 1 [file 22295337]

Suppl. Table 3. Data collected prospectively for the comparison between Behçet disease and

non-Behçet uveitis groups

- Date of visit when data were recorded
- Gender
- Uveitis duration (Months) since diagnosis of uveitis
- Diagnosis (Behçet disease uveitis or Other)
- Laterality: Bilateral/Unilateral

Presence of (Yes/No):

- Fulfillment of ISG criteria for Behçet disease (For Behçet uveitis patients)
- Recurrent disease course
- Granulomatous anterior uveitis
- Hypopyon
- Vitritis
- Inferior vitreous precipitates
- Branch retinal vein occlusion
- Peripheral occlusive periphlebitis
- Retinal hemorrhages
- Superficial retinal infiltrate(s)
- Choroiditis
- Gliotic retinal vascular sheathing
- Ghost vessels
- Optic atrophy
- Retinal nerve fiber layer defect
- Fluorescein angiographic diffuse capillary leakage
- Fluorescein angiographic capillary nonperfusion
